# Supplementary material for: Prominent Spasticity and Hyperreflexia of the Legs in a Nepalese Patient with Friedreich Ataxia
Source: PubMed Central journal article supplement — Intern Med. 2019 Jun 7;58(19):2865–9. doi: 10.2169/internalmedicine.2953-19 (PMC6815894; doi:10.2169/internalmedicine.2953-19), 2019-06-07
Supplement: 1349-7235-58-2865-s002.pdf [file 1349-7235-58-2865-s002.pdf]

**Supplementary Table 1.** Designed primers used for genotyping of SNP markers

| Markers    | PCR primers                   | Primer length (bp) |
|------------|-------------------------------|--------------------|
| FAD1       | FP 5'-AGGATTGTGGTGACAGTTGC-3' | 20                 |
|            | RP 5'-TTTTGGGGGAGACCAGTAAC-3' | 20                 |
| rs11145326 | FP 5'-TCGATCCTTGTCCCTCCATC-3' | 20                 |
|            | RP 5'-GGGAAGATCAAGCCTGAAG-3'  | 19                 |
| rs7861997  | FP 5'-GCCATGAGGAAGTGGAATG-3'  | 19                 |
|            | RP 5'-TCATGACATTGAGAGCCTGG-3' | 20                 |
| ITR3       | FP 5'-TGGGTTTTGTGCTTCCTCTG-3' | 20                 |
|            | RP 5'-TGATGCTTAGCTCTGCTGG-3'  | 19                 |
| CS2        | FP 5'-CCTGTGGCCTCGTTTTAATC-3' | 20                 |
|            | RP 5'-AAGTTGTGCTCCCATCAAGC-3' | 20                 |

FP, forward primer; RP, reverse primer
