# Supplementary material for: Prominent Spasticity and Hyperreflexia of the Legs in a Nepalese Patient with Friedreich Ataxia
Source: PubMed Central journal article supplement — Intern Med. 2019 Jun 7;58(19):2865–9. doi: 10.2169/internalmedicine.2953-19 (PMC6815894; doi:10.2169/internalmedicine.2953-19), 2019-06-07
Supplement: 1349-7235-58-2865-s003.pdf [file 1349-7235-58-2865-s003.pdf]

**Supplementary Table 2.** Runs of homozygosity (ROH) segments defined as a minimum of 2 Mb. Physical

positions were annotated against UCSC hg18.

| Chromosome | Start    | End      | Range (kb) | Number of SNPs |
|------------|----------|----------|------------|----------------|
| 1          | 81669334 | 84534335 | 2865.001   | 979            |
| 4          | 32638425 | 34826055 | 2187.63    | 436            |
| 4          | 37344879 | 43868349 | 6523.47    | 2178           |
| 4          | 43885151 | 49278866 | 5393.715   | 1110           |
| 4          | 52391549 | 55124787 | 2733.238   | 782            |
| 7          | 1198204  | 5497369  | 4299.165   | 1340           |
| 7          | 79191176 | 91012423 | 11821.247  | 3531           |
| 9          | 70195938 | 72592021 | 2396.083   | 961            |
| 13         | 28486617 | 30603821 | 2117.204   | 1075           |
| 13         | 32485329 | 35176224 | 2690.895   | 1019           |
| 16         | 45092478 | 47095437 | 2002.959   | 236            |
